# Supplementary figures and images for: Integrative study of skeletal muscle mitochondrial dysfunction in a murine pancreatic cancer-induced cachexia model
Source: eLife journal article supplement (doi:10.7554/elife.93312), 2024-01-24

Uncropped blot with the relevant band and samples clearly labelled

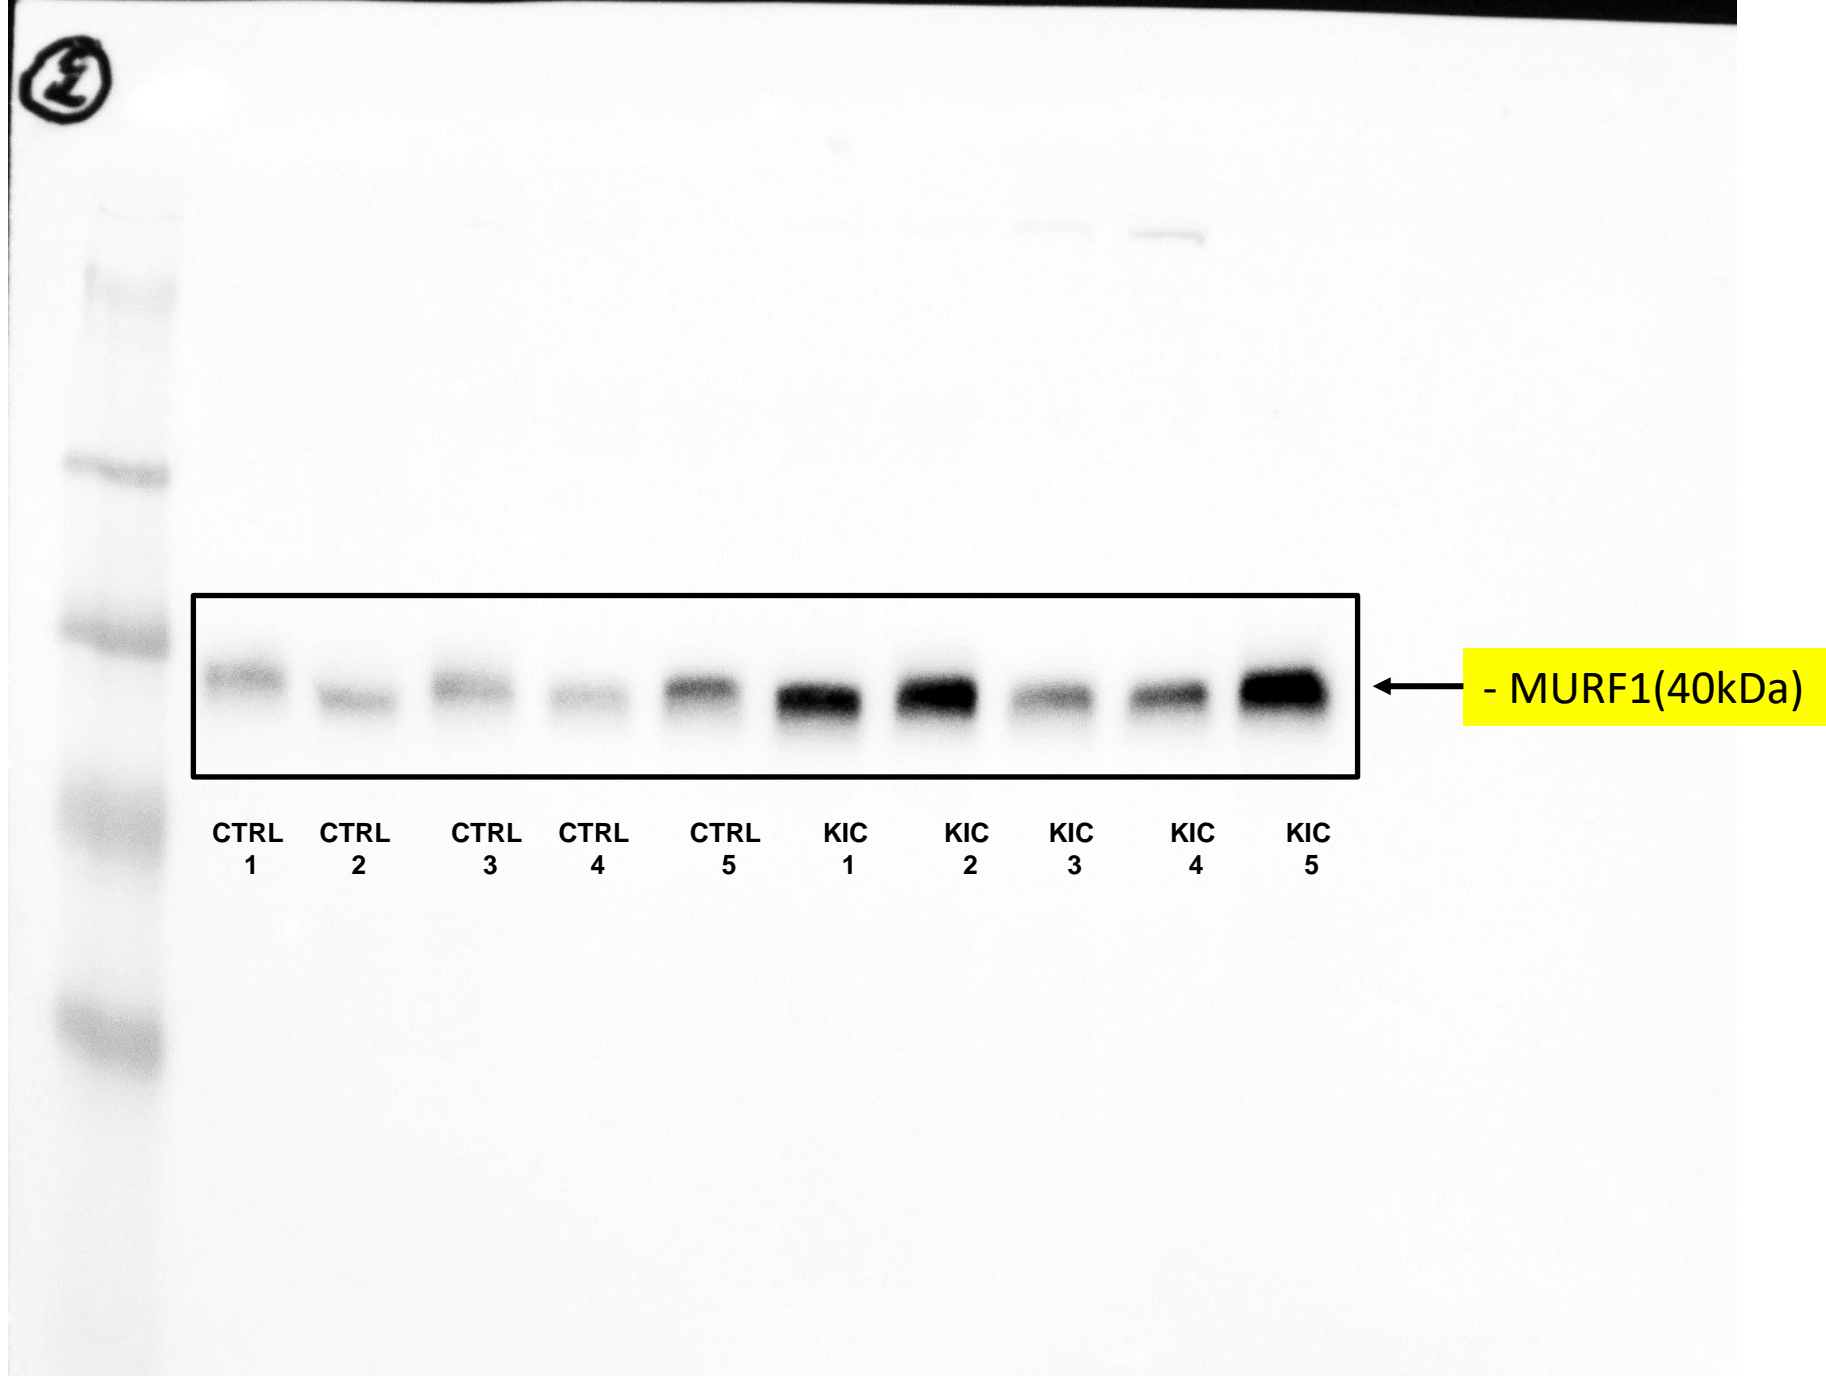

Supplement: fig2-data1 [file elife-93312-fig2-data1-v1.zip]

Uncropped gel with the relevant band and samples clearly labelled

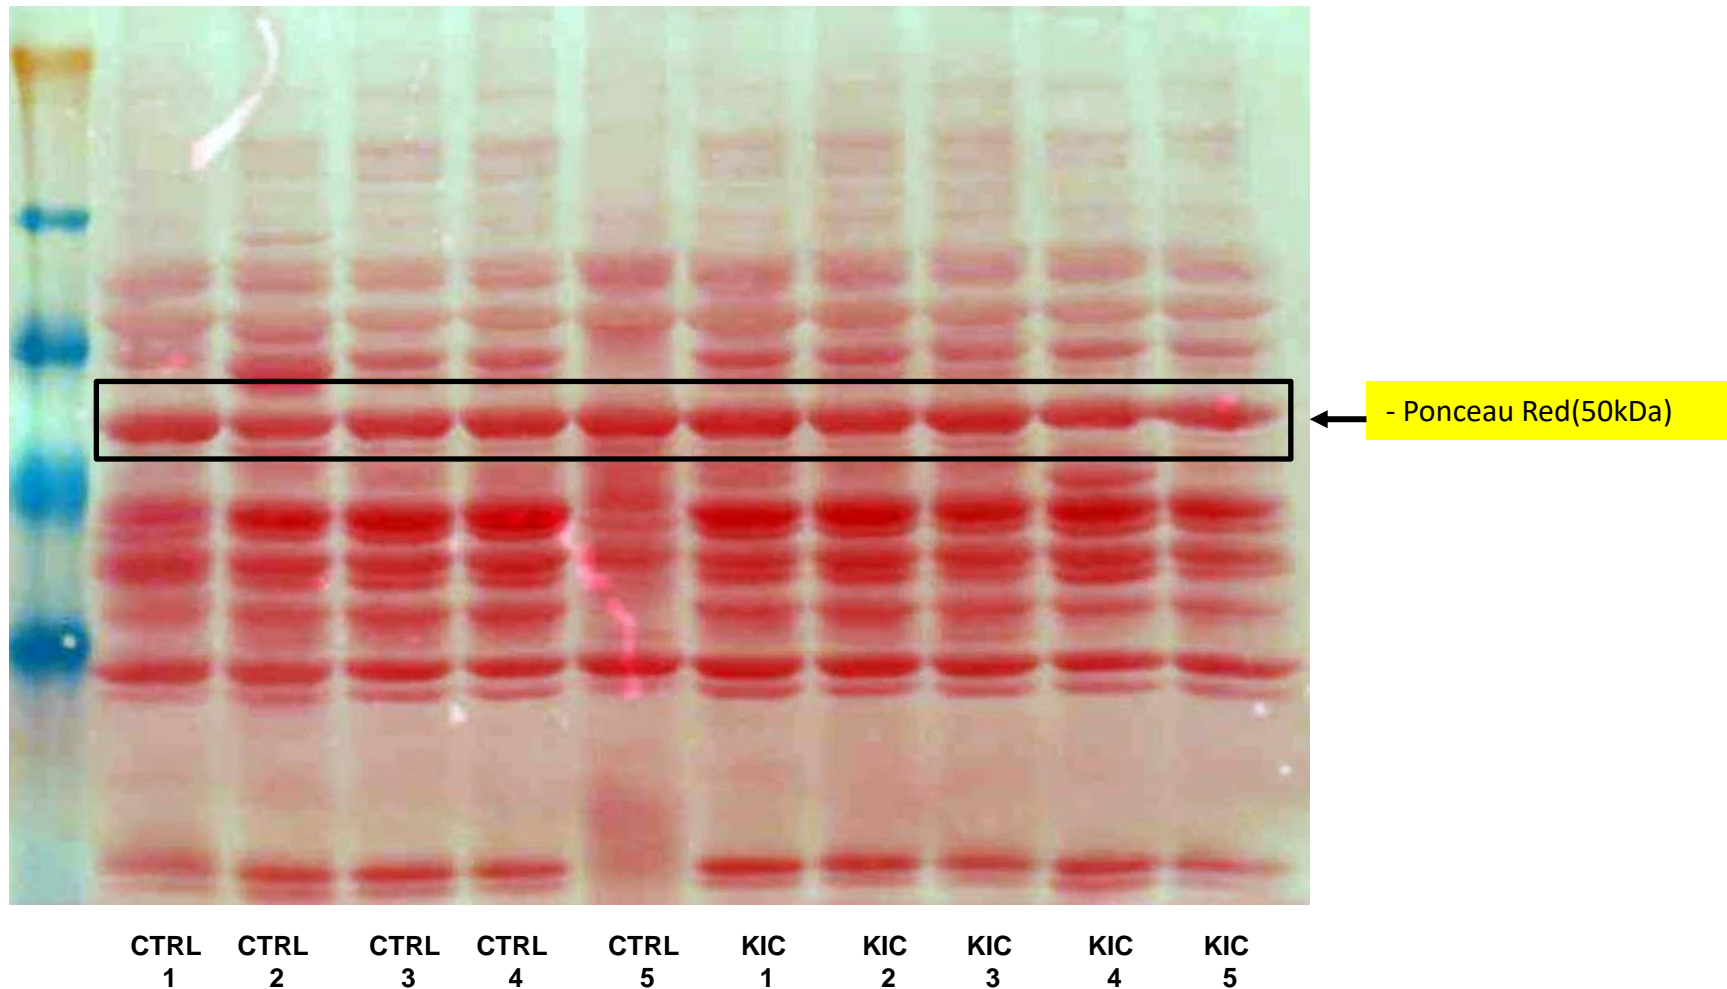

Supplement: fig2-data1 [file elife-93312-fig2-data1-v1.zip]

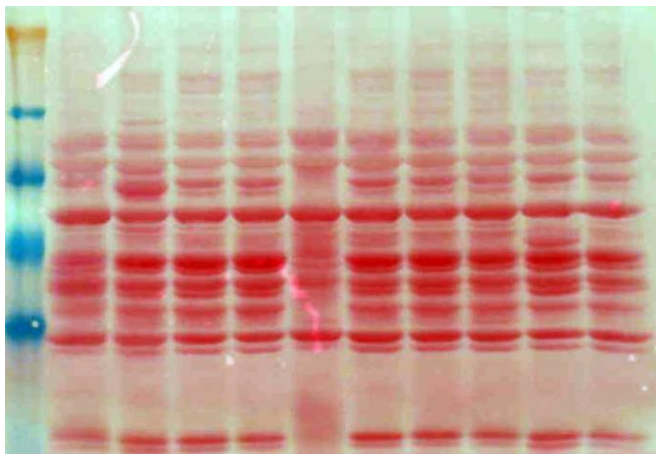

Supplement: fig2-data2 [file elife-93312-fig2-data2-v1.zip]

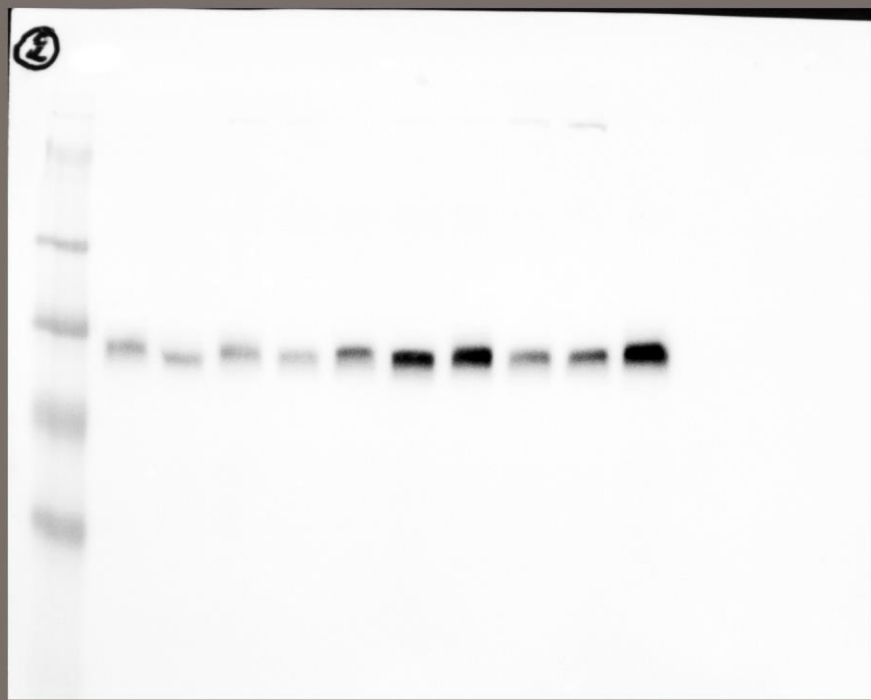

Supplement: fig2-data2 [file elife-93312-fig2-data2-v1.zip]

Mitochondrial complexes – Uncropped Ponceau Red

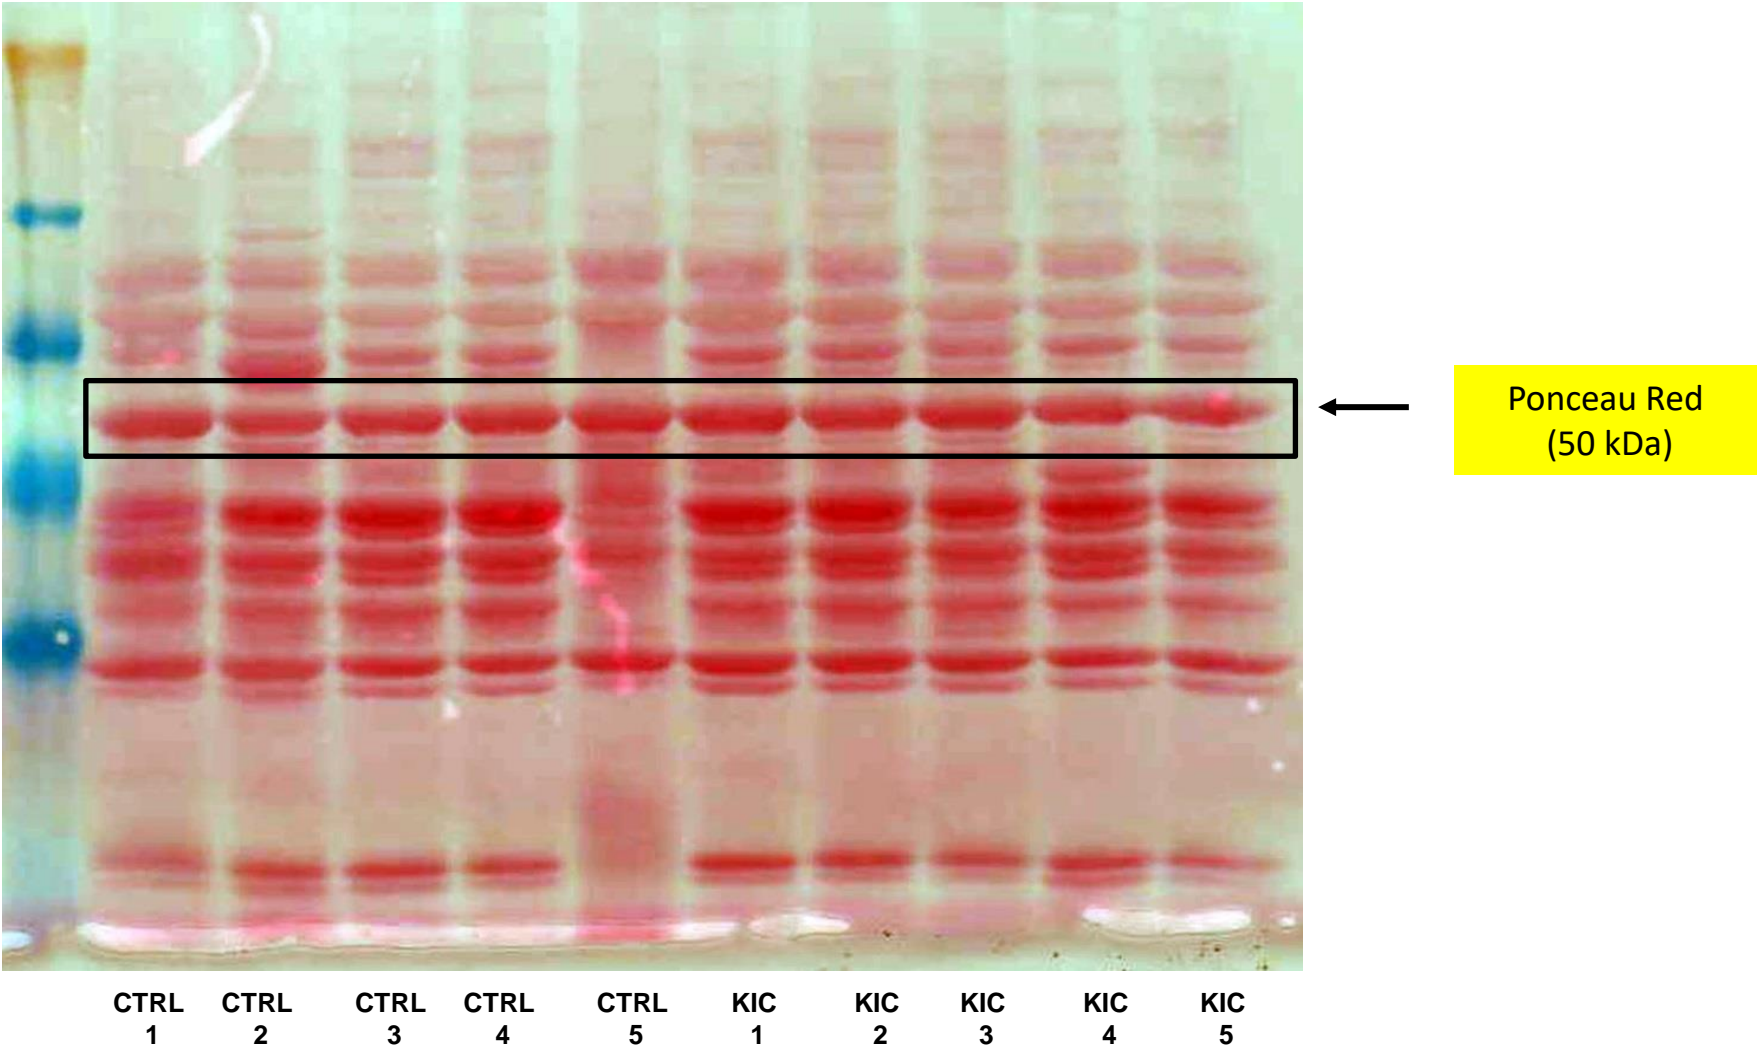

Supplement: fig4-data1 [file elife-93312-fig4-data1-v1.zip]

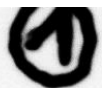

## Mitochondrial complexes – Western blot

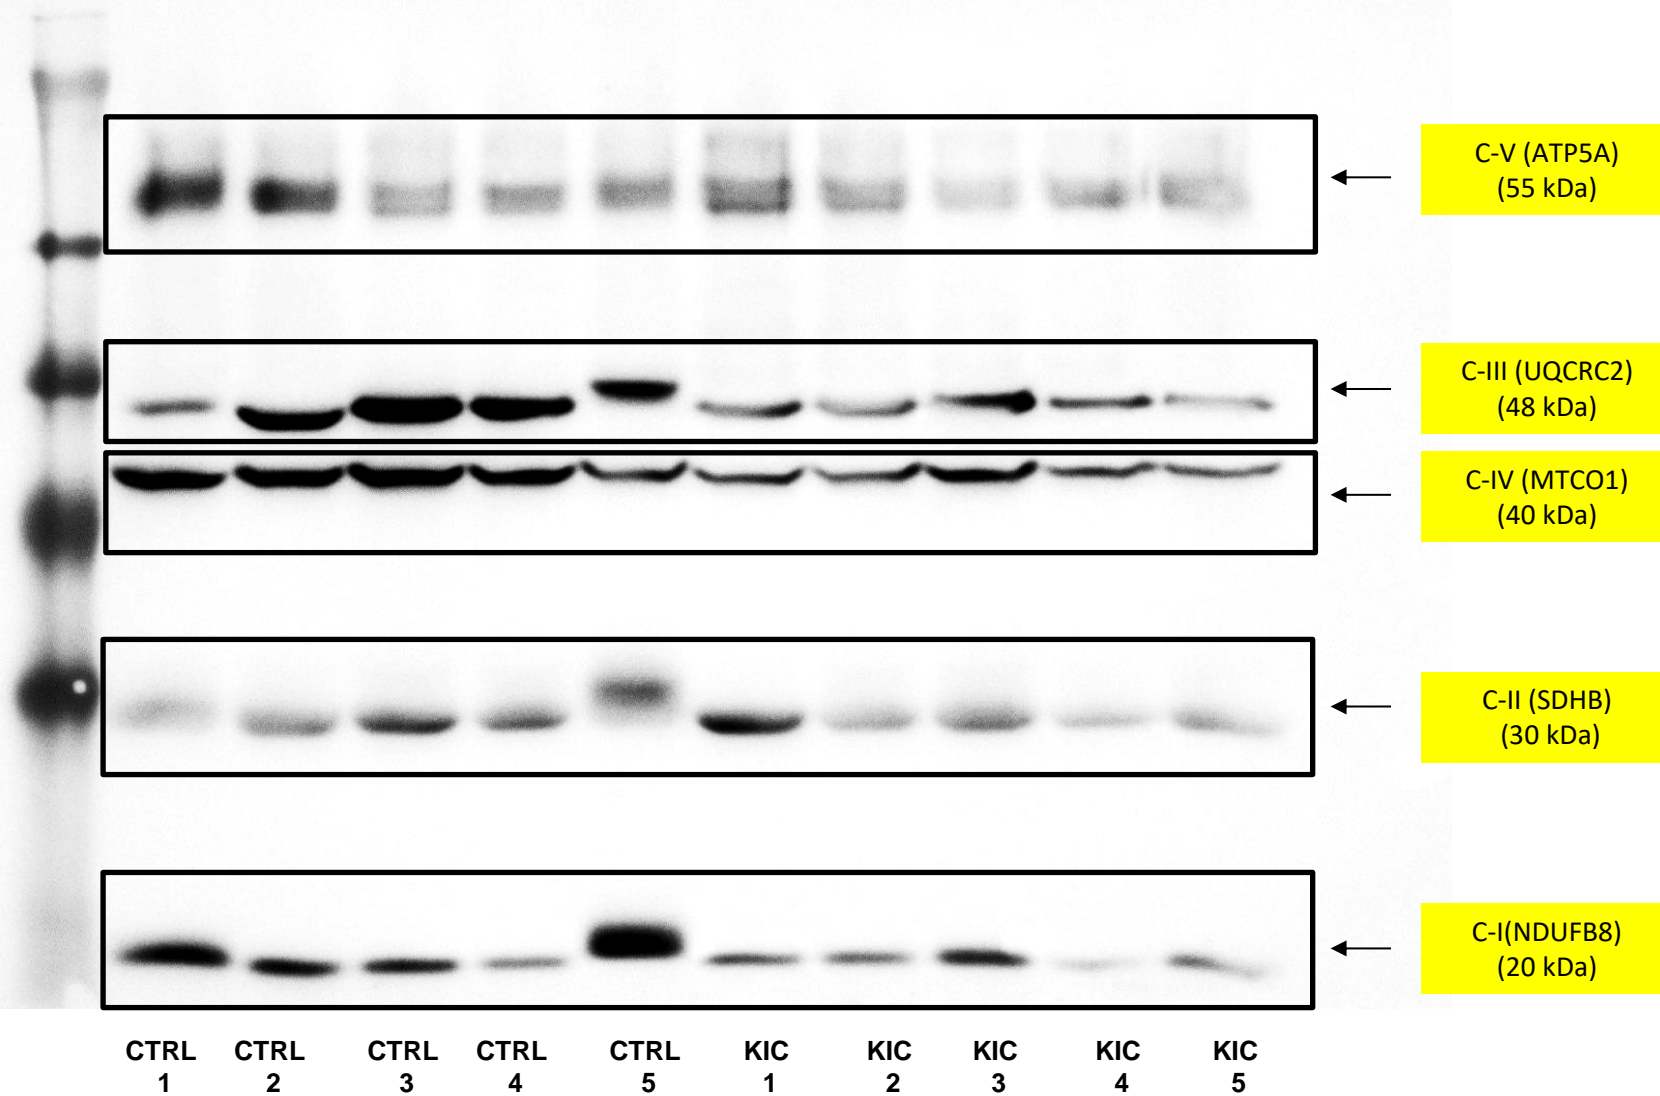

Supplement: fig4-data1 [file elife-93312-fig4-data1-v1.zip]

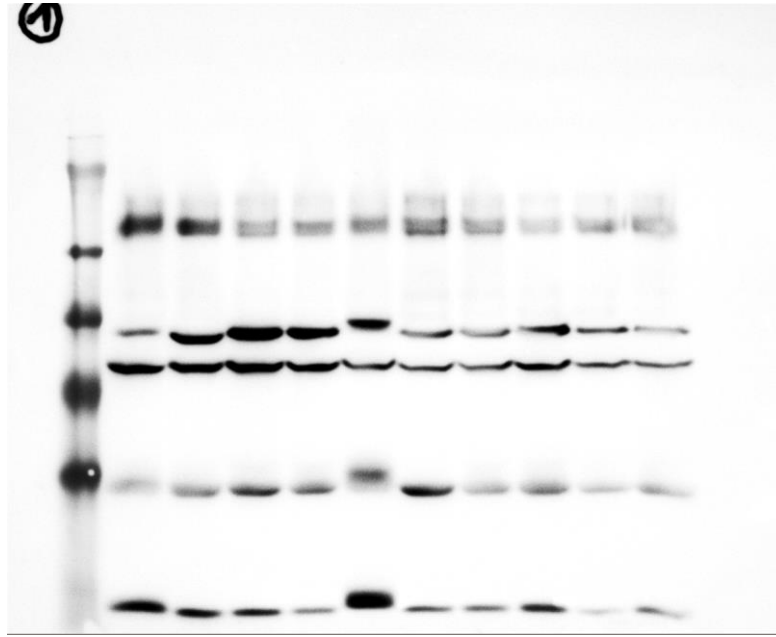

Supplement: fig4-data2 [file elife-93312-fig4-data2-v1.zip]

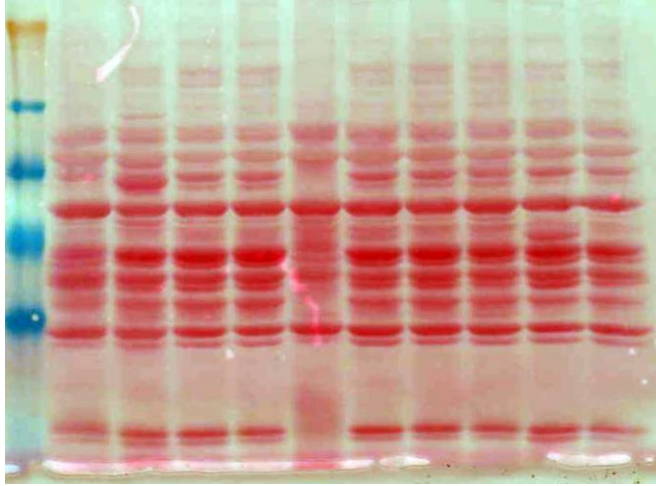

Supplement: fig4-data2 [file elife-93312-fig4-data2-v1.zip]

## OPA1 - staining

Uncropped blot with the relevant band and samples clearly labelled

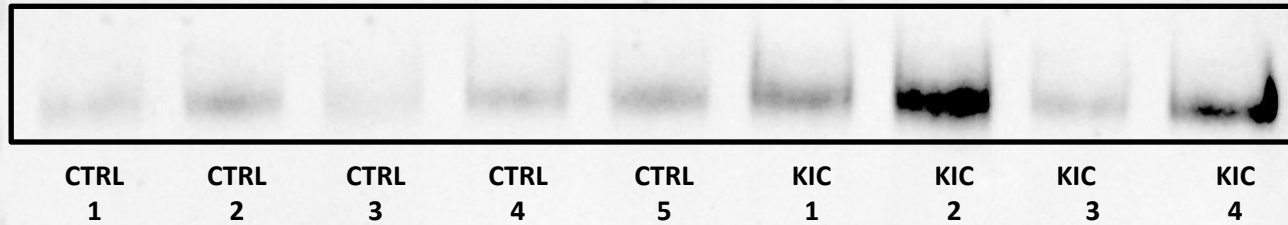

- OPA1  
(111kDa)

Supplement: fig5-data1 [file elife-93312-fig5-data1-v1.zip]

## TFAM staining

Uncropped blot with the relevant band and samples clearly labelled

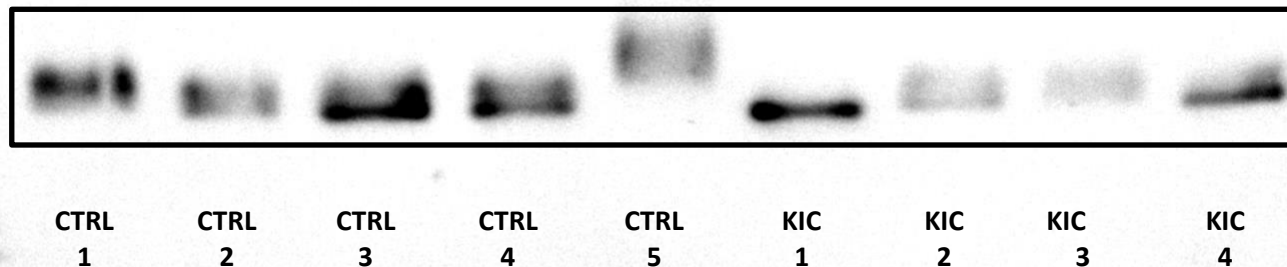

← - TFAM  
(29kDa)

Supplement: fig5-data1 [file elife-93312-fig5-data1-v1.zip]

## PGC1a staining

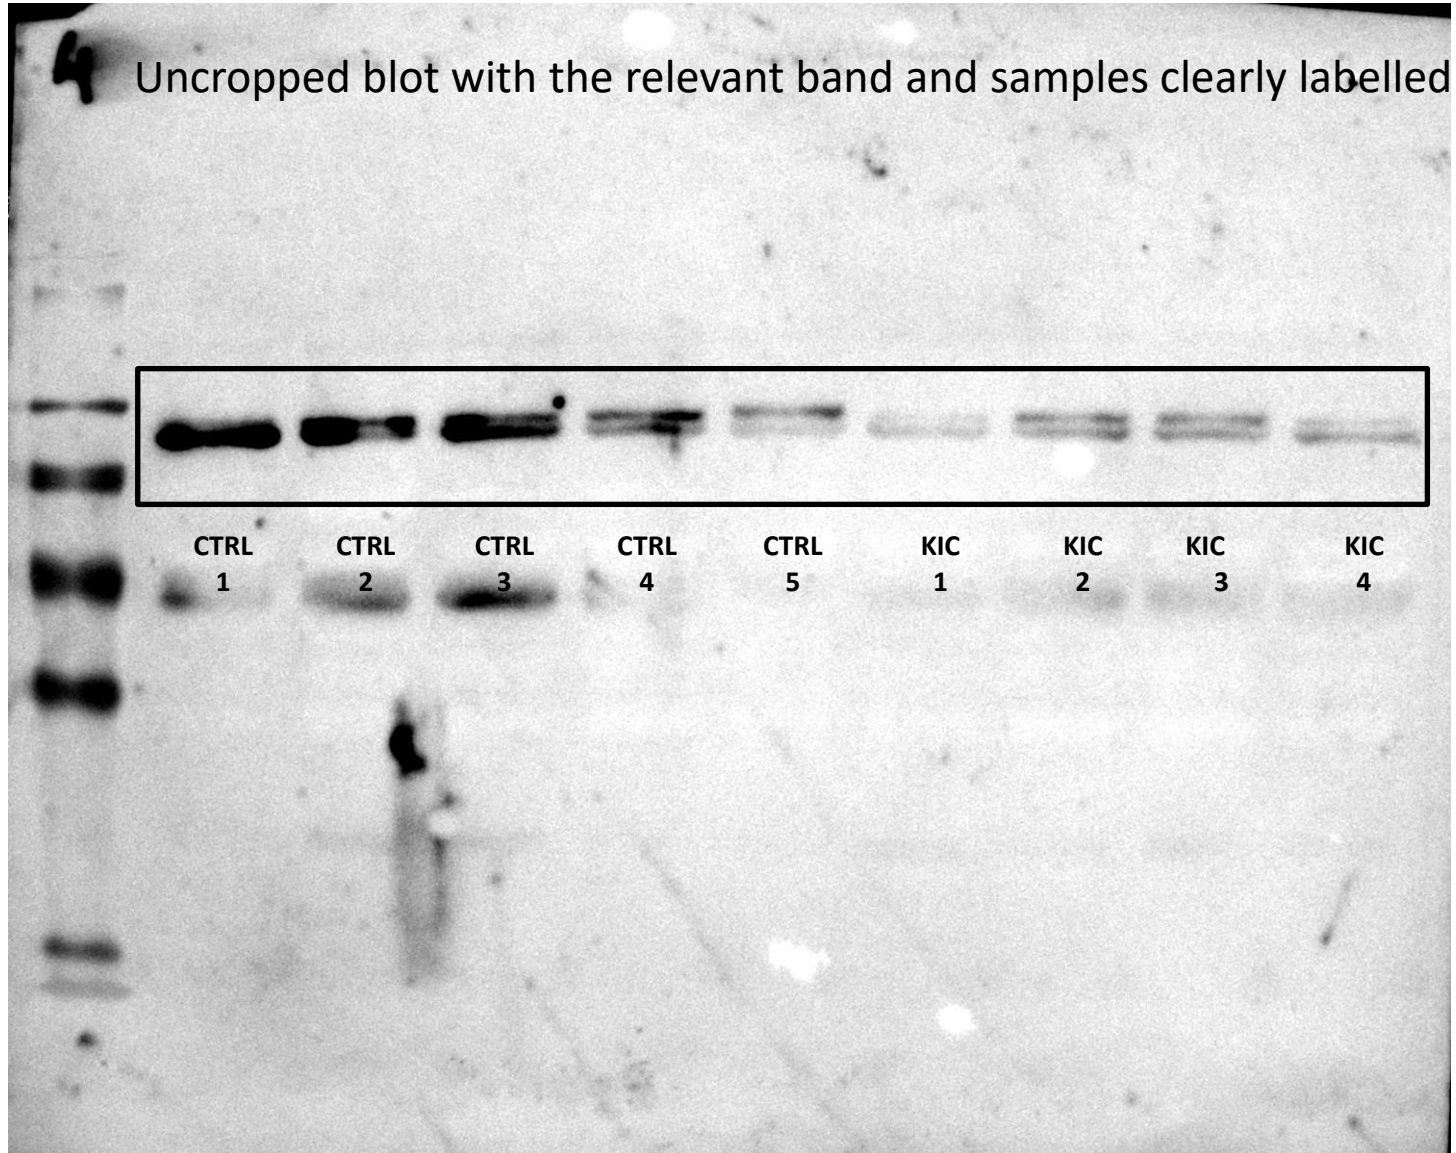

← - PGC1a  
(91kDa)

Supplement: fig5-data1 [file elife-93312-fig5-data1-v1.zip]

## PGC1a – Amido Black

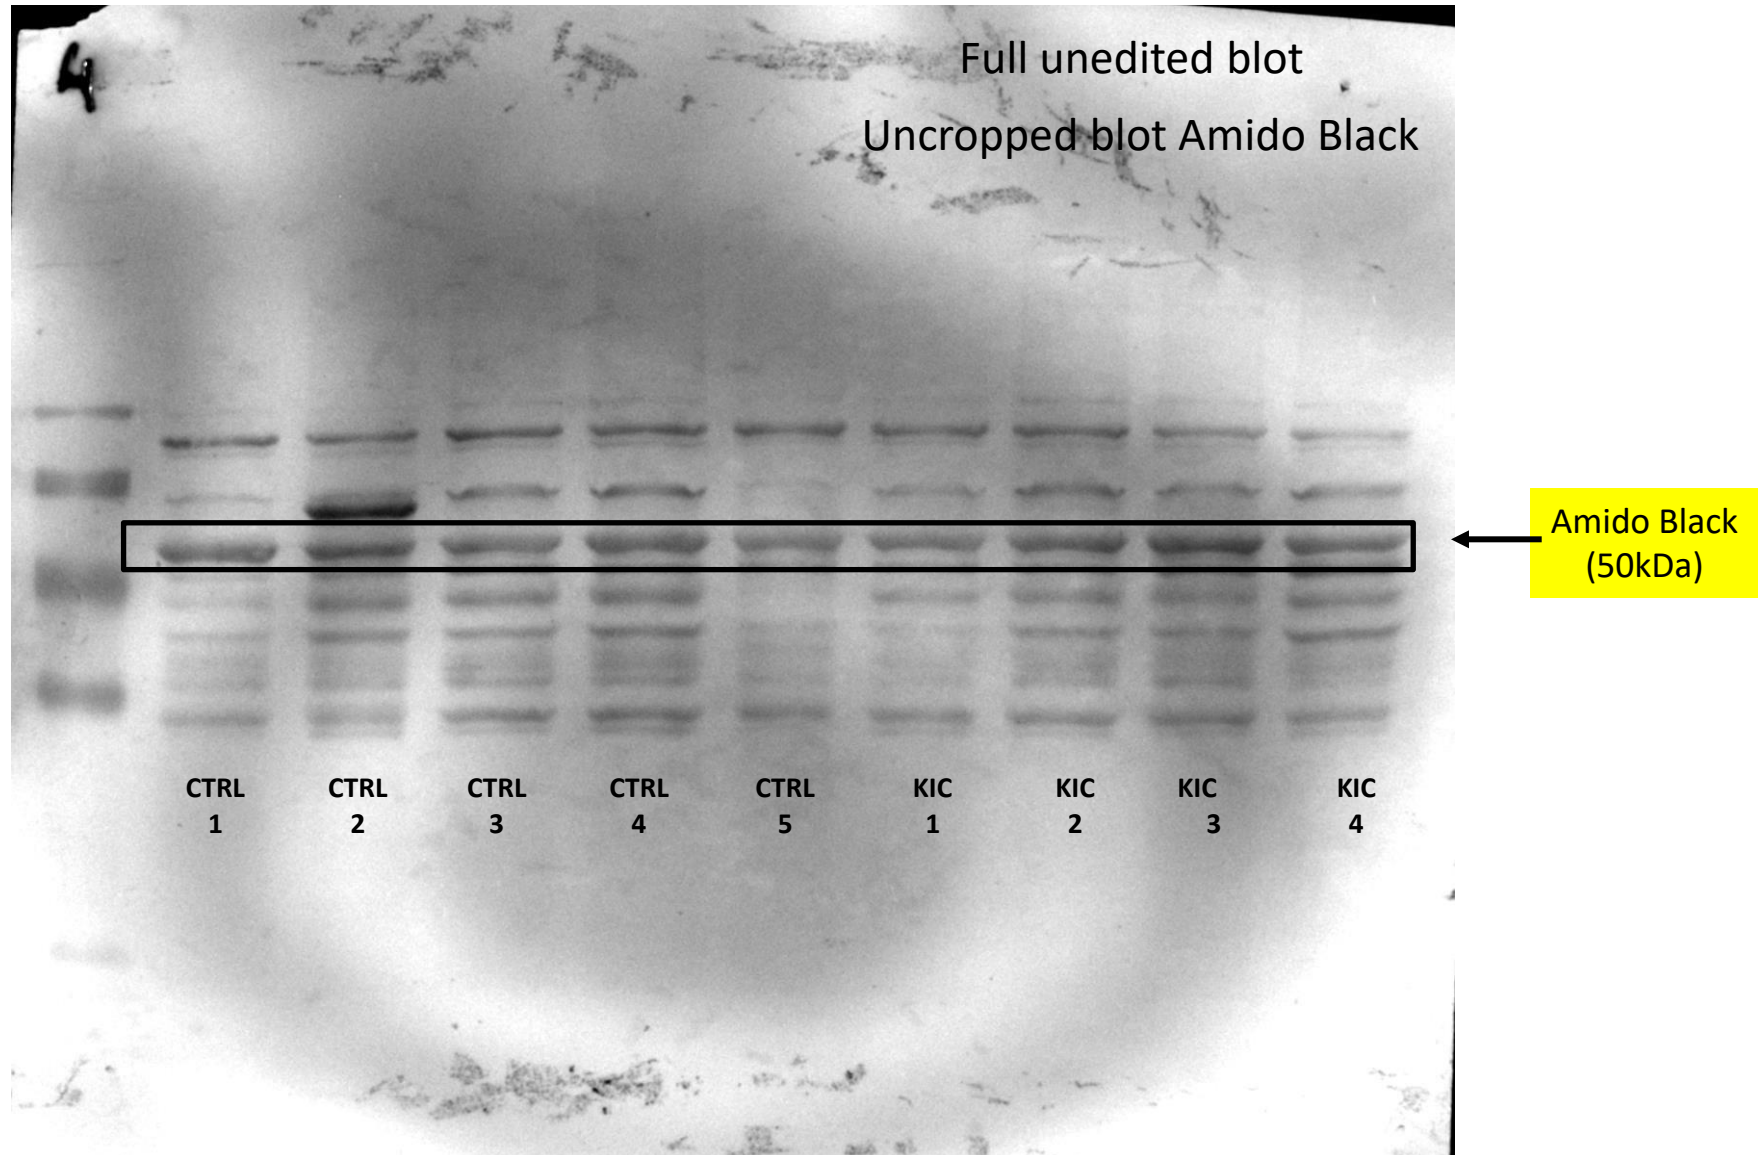

Supplement: fig5-data1 [file elife-93312-fig5-data1-v1.zip]

## Mitofusin 1+2 staining

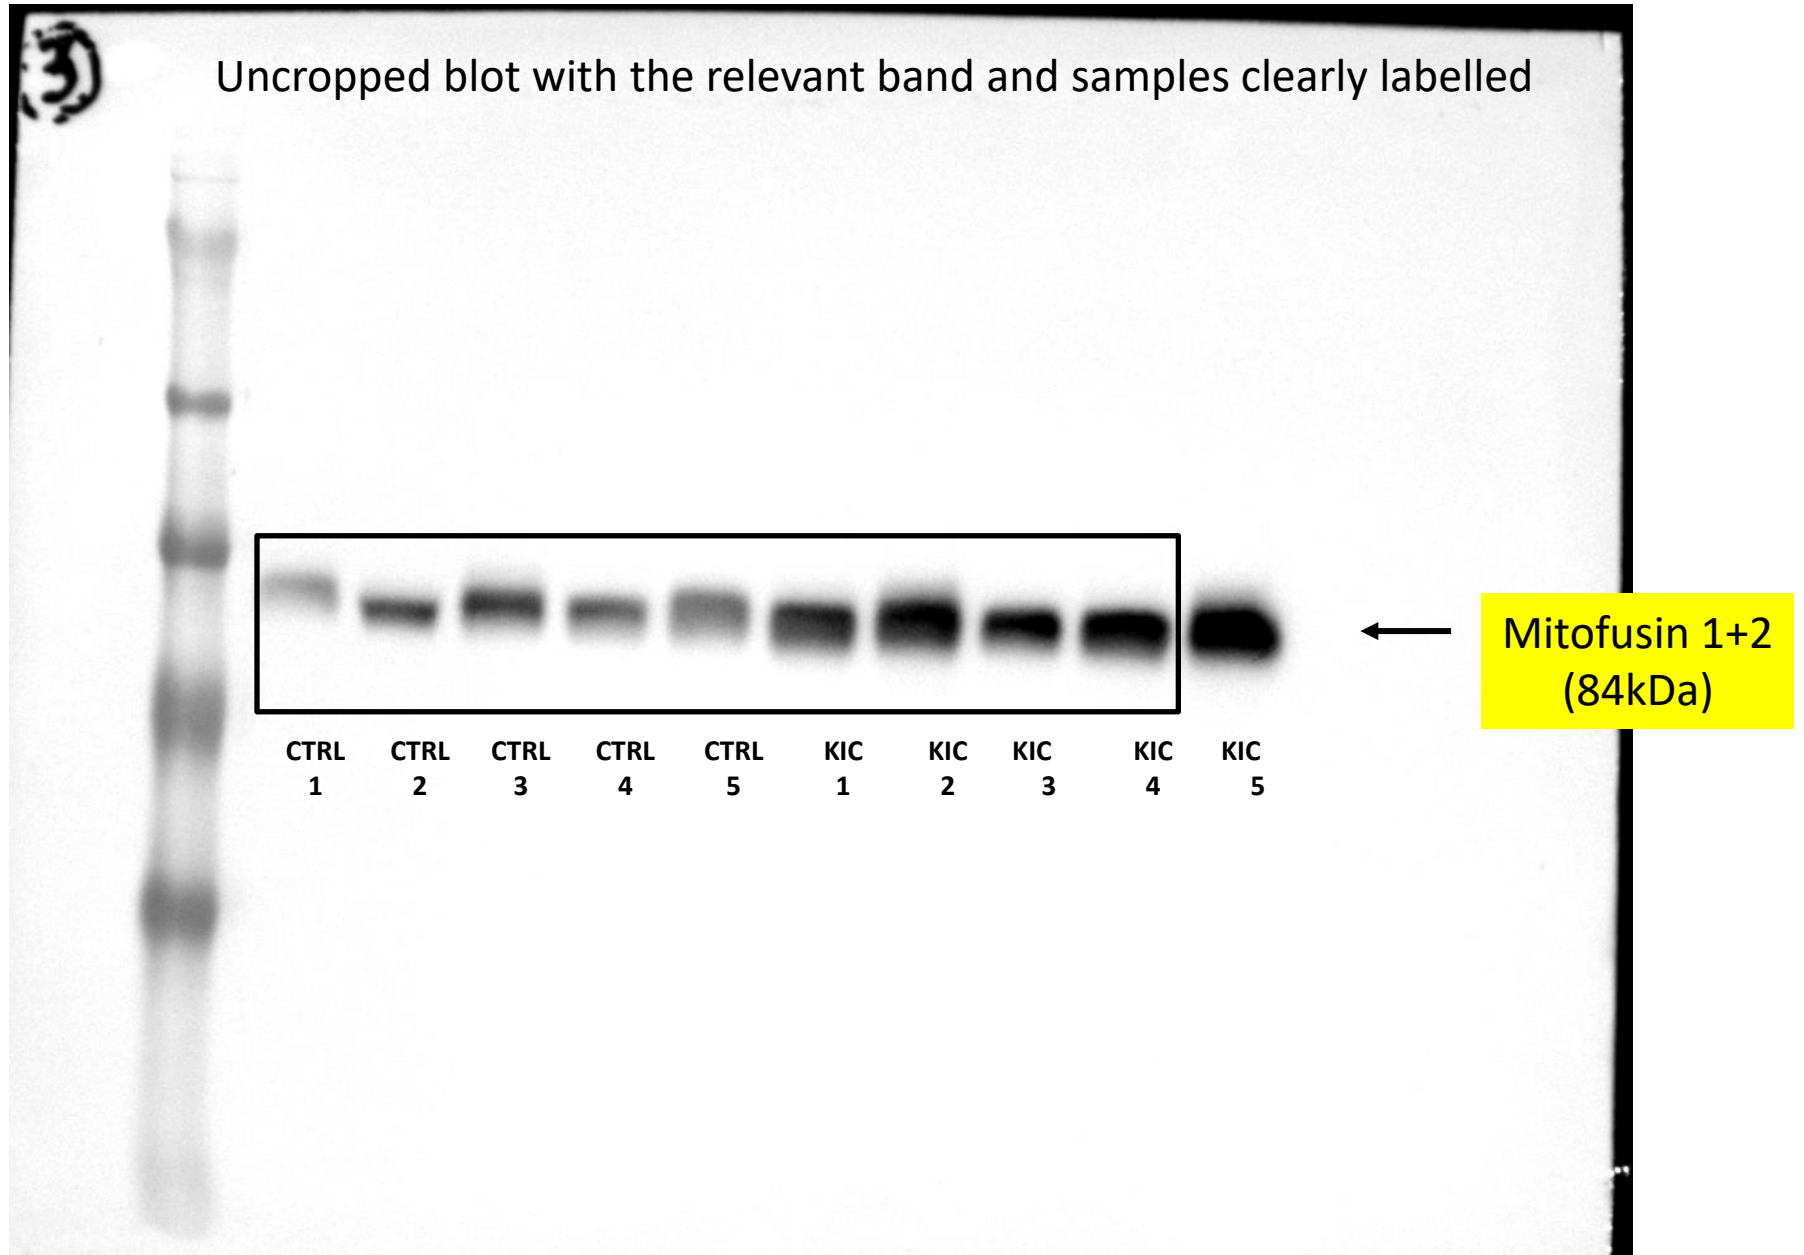

Supplement: fig5-data1 [file elife-93312-fig5-data1-v1.zip]

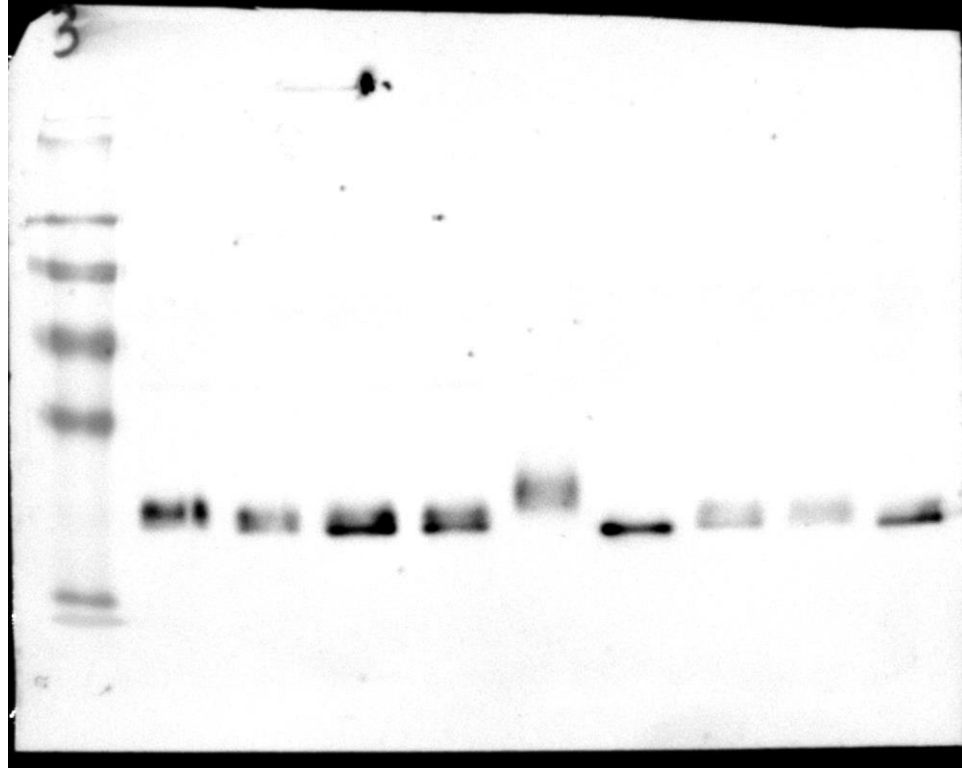

Supplement: fig5-data2 [file elife-93312-fig5-data2-v1.zip]

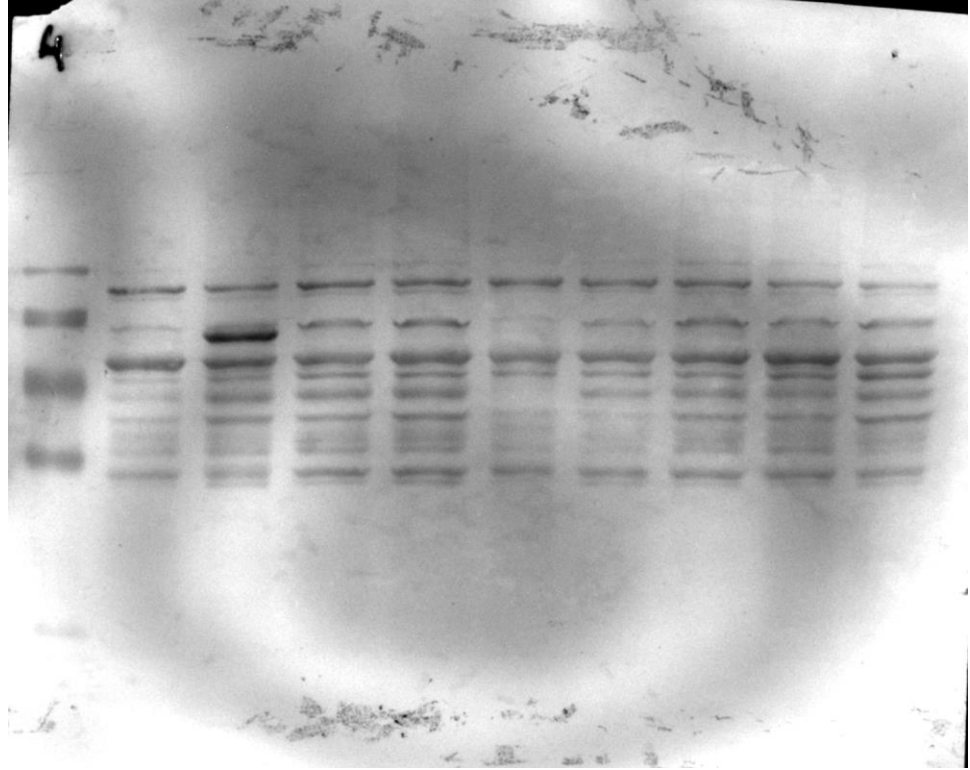

Supplement: fig5-data2 [file elife-93312-fig5-data2-v1.zip]

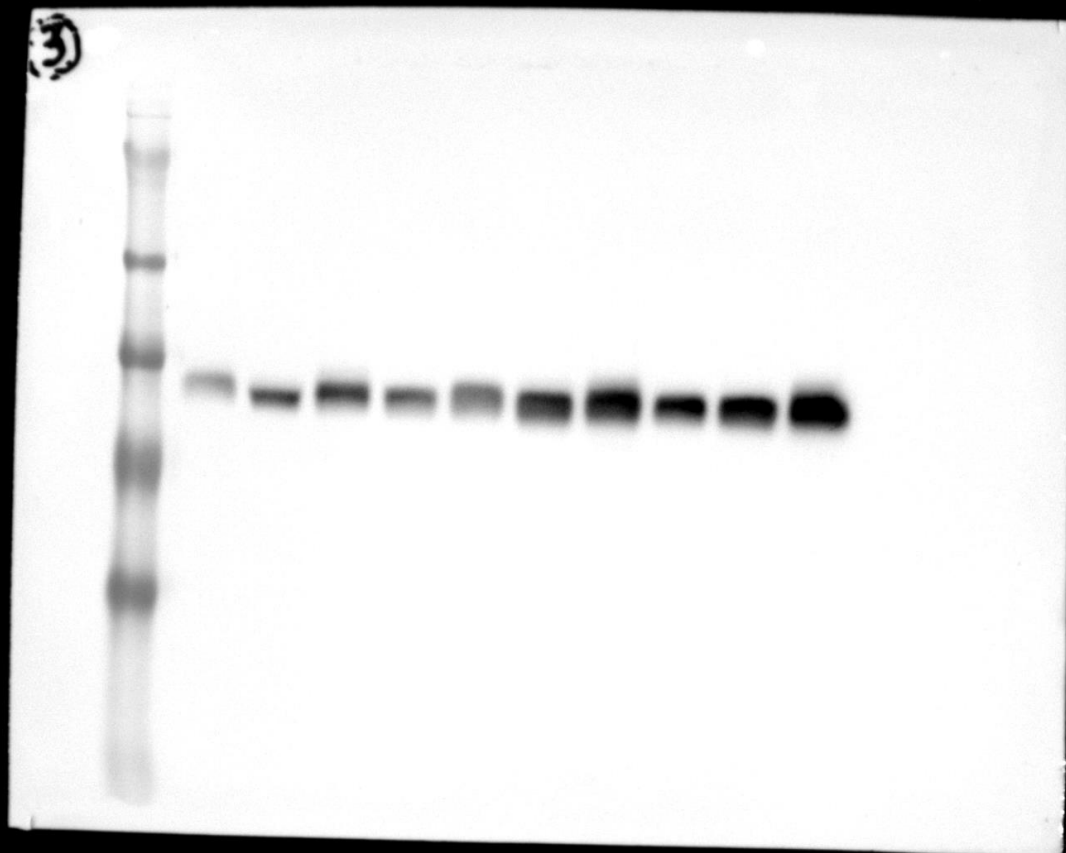

Supplement: fig5-data2 [file elife-93312-fig5-data2-v1.zip]

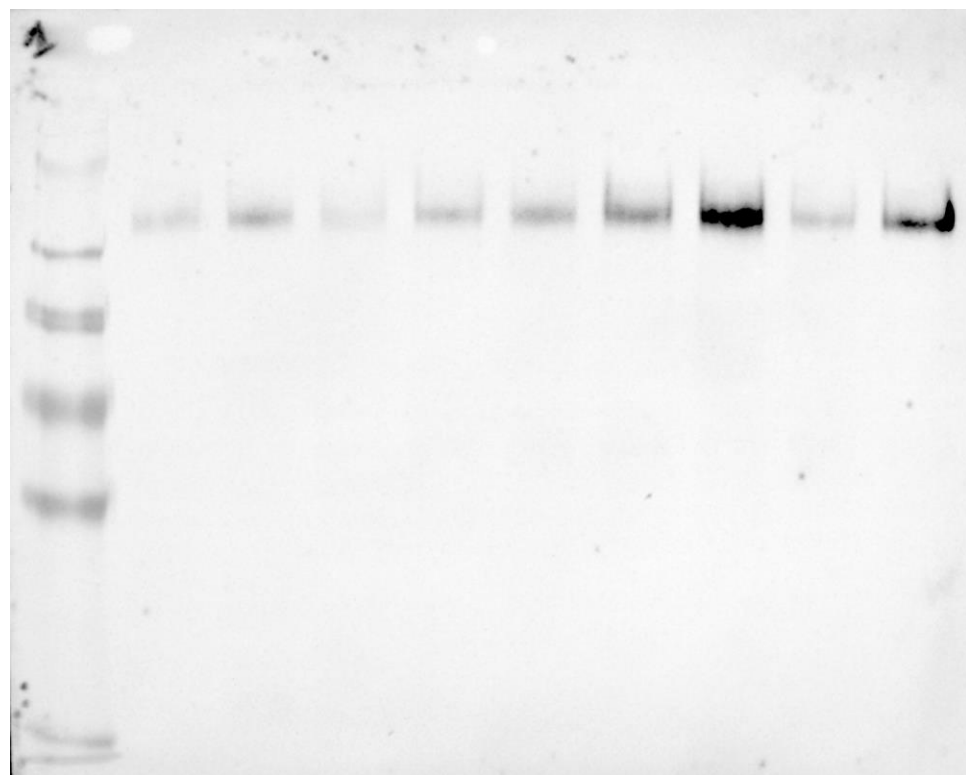

Supplement: fig5-data2 [file elife-93312-fig5-data2-v1.zip]

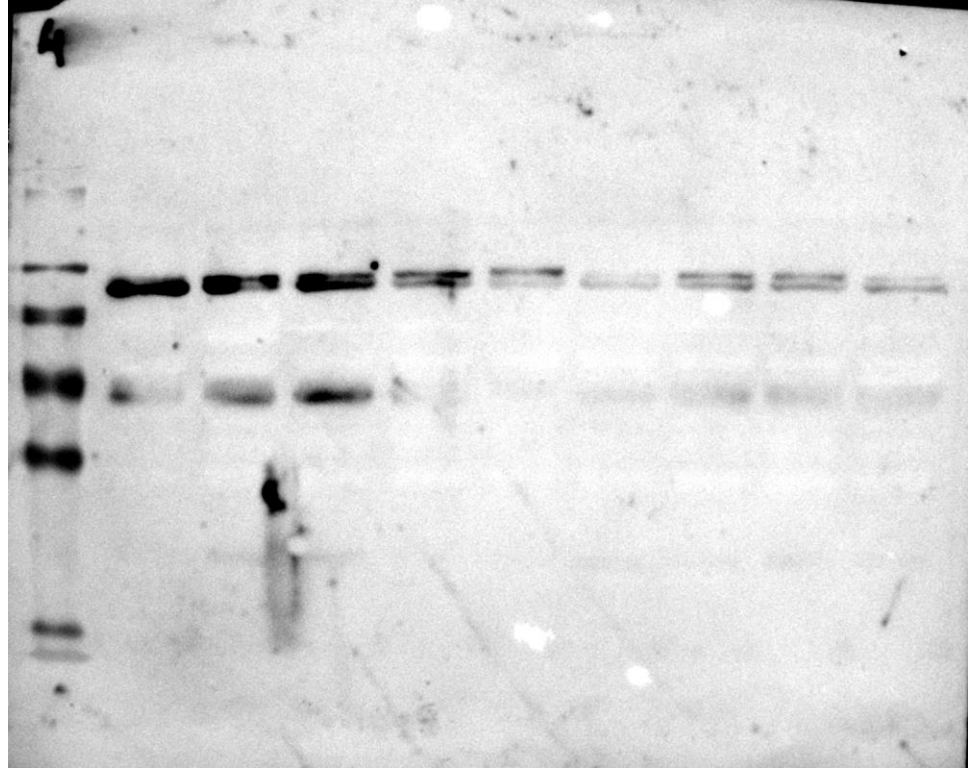

Supplement: fig5-data2 [file elife-93312-fig5-data2-v1.zip]
